# Supplementary material for: Molecular mechanism on two fluoroquinolones inducing oxidative stress: evidence from copper/zinc superoxide dismutase
Source: Royal Society of Chemistry journal article supplement (doi:10.1039/c6ra19454k), 2016-01-01
Supplement: c6ra19454k1.pdf [file c6ra19454k1.pdf]

## Supporting Information

### SI text

#### S1 Principles of Fluorescence Quenching

If the quenching mechanism belongs to the dynamic quenching, it should follow the well-known Stern-Volmer equation,<sup>28</sup>

$$F_0 / F = 1 + K_{sv}[Q] = 1 + K_q \tau_0 [Q] \quad (1)$$

where  $F_0$  and  $F$  denote the steady-state fluorescence intensities in the absence and presence of quencher, respectively.  $K_q$  is the quenching rate constant of the biological macromolecule;  $K_{sv}$  is the Stern–Volmer quenching constant;  $[Q]$  is the concentration of quencher;  $\tau_0$  is the average lifetime of the molecule without any quencher and the fluorescence lifetime of the biopolymer is  $10^{-8}$  s.<sup>28</sup>

If not, the fluorescence quenching of CAT should be analyzed using the modified Stern–Volmer equation:<sup>18</sup>

$$\frac{F_0}{\Delta F} = \frac{1}{f_a K_a} \frac{1}{[Q]} + \frac{1}{f_a} \quad (2)$$

In that case,  $\Delta F$  is the difference in fluorescence intensity between the absence and presence of the quenching compound at concentration  $[Q]$ ;  $K_a$  is the effective quenching constant for the accessible fluorophores, and  $f_a$  is the fraction of accessible fluorescence. The dependence of  $F_0/\Delta F$  on the reciprocal value of the quenching compound concentration  $[Q]^{-1}$  is linear, with slope equal to the value of  $(f_a K_a)^{-1}$ .

#### S2 Analysis on Thermodynamic Parameters and Binding Modes

If the temperature only changes a little, the enthalpy change ( $\Delta H$ ) can be regarded

as a constant in the formula below: <sup>28</sup>

$$\ln\left(\frac{K_2}{K_1}\right) = \frac{\Delta H}{R} \left(\frac{1}{T_1} - \frac{1}{T_2}\right) \quad (3)$$

$$\Delta G = \Delta H - T\Delta S = -RT \ln K \quad (4)$$

where  $K_1$  and  $K_2$  are the binding constants (analogous to  $K_a$  in Equation 2) at  $T_1$  and  $T_2$ , and  $R$  is the universal gas constant.

For a static quenching interaction, the binding constant ( $K_b$ ) and the number of binding sites ( $n$ ) can be determined using the following formula, <sup>18</sup>

$$\log \frac{F_0 - F}{F} = \log K_b + n \log [Q] \quad (5)$$

where  $F_0$ ,  $F$ , and  $[Q]$  are the same as in Equation 2;  $K_b$  is the binding constant and  $n$  is the number of binding sites per molecule.

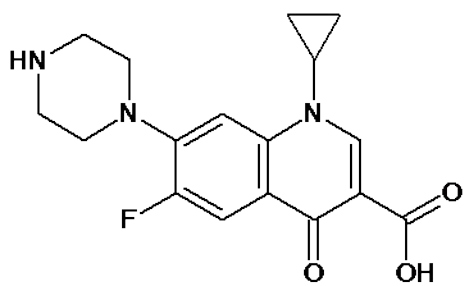

**ciprofloxacin**  
**(CPFX)**

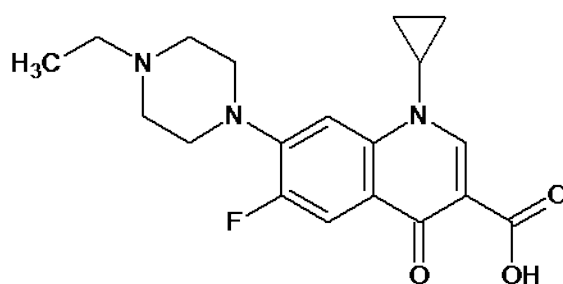

**enrofloxacin**  
**(ENFX)**

**Scheme S1 Molecular structure of CPFX and ENFX.**

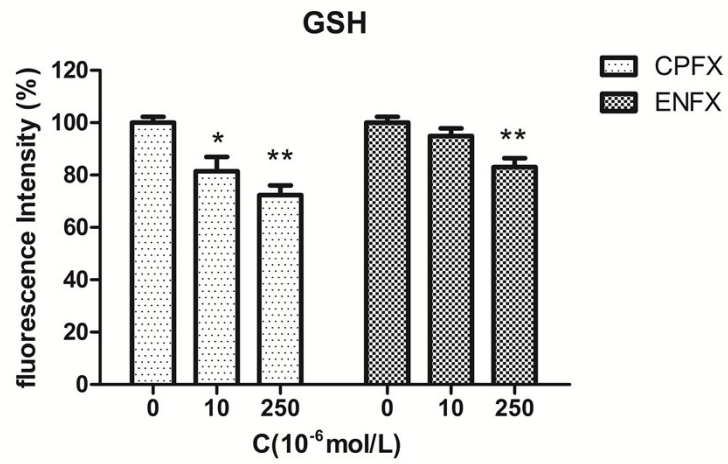

**Fig. S1 Average amount of GSH in single erythrocytes incubated with CPFX and ENFX.<sup>18</sup>**

Statistical significance vs control group: \* $p < 0.05$ , \*\* $p < 0.01$ ; The values  $\pm$  standard deviations were estimated from 180 individual cells.<sup>18</sup>

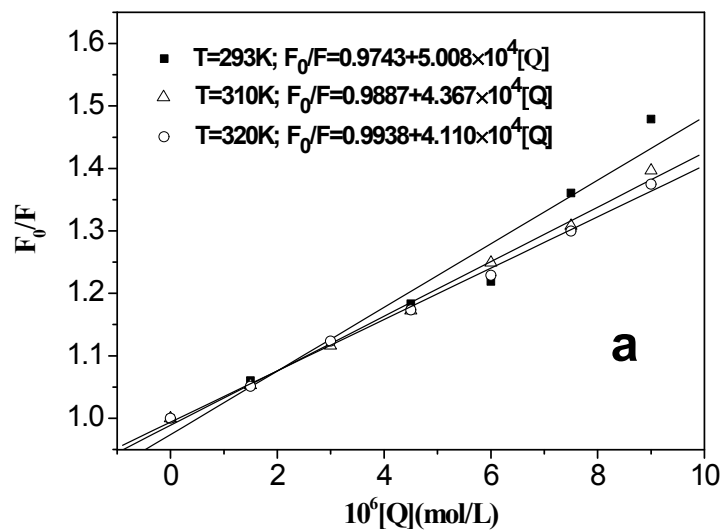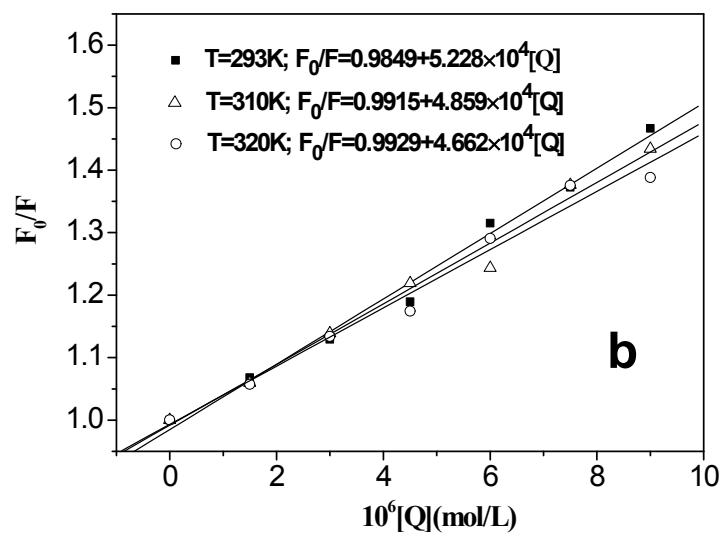

**Fig. S2 Stern–Volmer plots of CPFX (a) and ENFX (b) quenching with Cu/Zn-SOD at three different temperatures**

Conditions: Cu/Zn-SOD:  $3\times 10^{-6}$  mol/L; Buffer:  $\text{NaH}_2\text{PO}_4/\text{Na}_2\text{HPO}_4$ , pH=7.4.

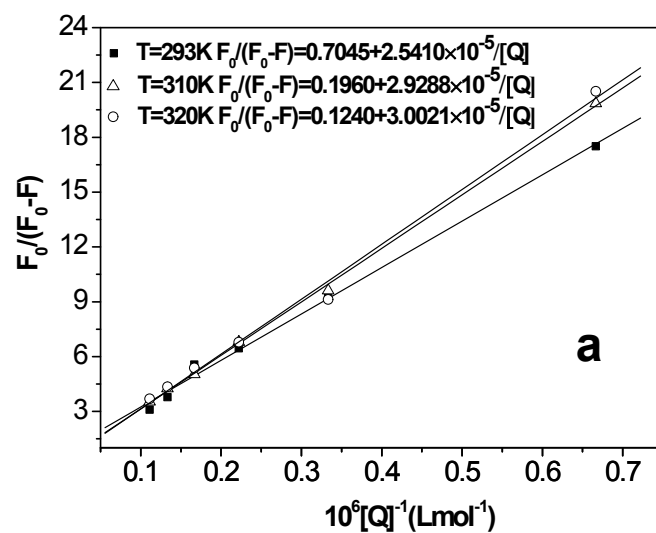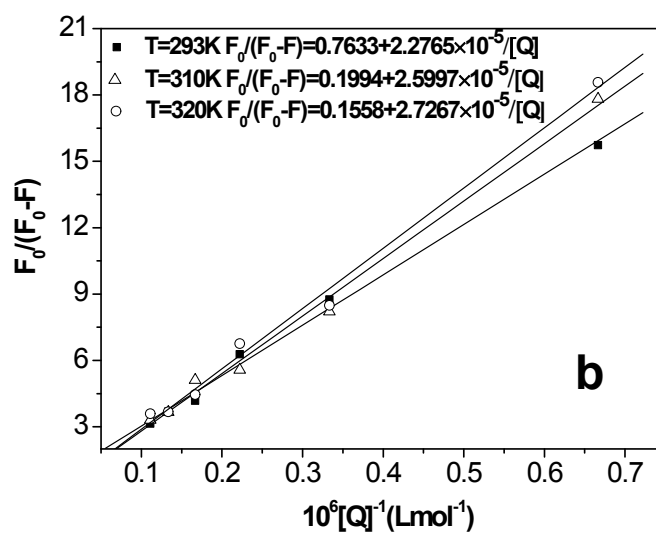

**Fig. S3 Modified Stern–Volmer plots for the quenching of Cu/Zn-SOD by CPFY**

**(a) and ENFX (b) at different temperatures**

Conditions: Cu/Zn-SOD:  $3 \times 10^{-6}$  mol/L; Buffer:  $\text{NaH}_2\text{PO}_4/\text{Na}_2\text{HPO}_4$ , pH=7.4.

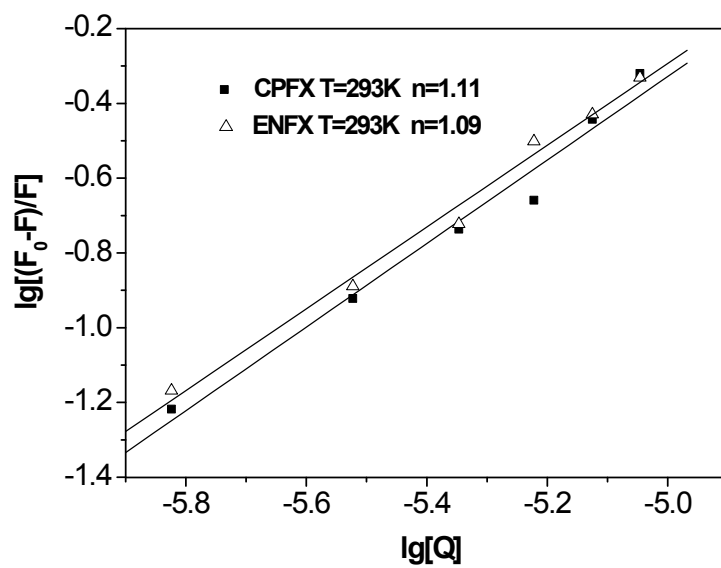

**Fig. S4 Plots of  $\log [(F_0 - F)/F]$  vs  $\log [Q]$  for the binding of CPF (■) and ENF (△) to Cu/Zn-SOD at 293K.**

**Table S1 Stern–Volmer quenching constants for the interaction of both CPFEX and ENFX with Cu/Zn-SOD at different temperatures**

|              | T(K) | $K_{sv}$ ( $\times 10^4 \text{ Lmol}^{-1}$ ) | $k_q$ ( $\times 10^{12} \text{ Lmol}^{-1} \text{ s}^{-1}$ ) | R      | SD     |
|--------------|------|----------------------------------------------|-------------------------------------------------------------|--------|--------|
| <b>CPFEX</b> | 293  | 5.008                                        | 5.008                                                       | 0.9790 | 0.0376 |
|              | 310  | 4.367                                        | 4.367                                                       | 0.9976 | 0.0108 |
|              | 320  | 4.110                                        | 4.110                                                       | 0.9982 | 0.0087 |
| <b>ENFX</b>  | 293  | 5.228                                        | 5.228                                                       | 0.9949 | 0.0189 |
|              | 310  | 4.859                                        | 4.859                                                       | 0.9927 | 0.0209 |
|              | 320  | 4.662                                        | 4.662                                                       | 0.9895 | 0.0242 |



**Table S2 Binding parameters for FQ/SOD interactions at pH 7.4**

|             | <b>T(K)</b> | <b>K<sub>a</sub></b><br><b>(×10<sup>4</sup> Lmol<sup>-1</sup>)</b> | <b>R</b> | <b>ΔH</b><br><b>KJ·mol<sup>-1</sup></b> | <b>ΔG</b><br><b>KJ·mol<sup>-1</sup></b> | <b>ΔS</b><br><b>J·mol<sup>-1</sup></b> |
|-------------|-------------|--------------------------------------------------------------------|----------|-----------------------------------------|-----------------------------------------|----------------------------------------|
|             | 293         | 2.76                                                               | 0.9974   |                                         | -24.91                                  | -127.41                                |
| <b>CPFX</b> | 310         | 0.68                                                               | 0.9995   | -62.24                                  | -22.75                                  | -127.39                                |
|             | 320         | 0.41                                                               | 0.9967   |                                         | -22.14                                  | -125.31                                |
|             | 293         | 3.35                                                               | 0.9974   |                                         | -25.39                                  | -136.31                                |
| <b>ENFX</b> | 310         | 0.77                                                               | 0.9964   | -65.33                                  | -23.07                                  | -136.32                                |
|             | 320         | 0.57                                                               | 0.9964   |                                         | -23.01                                  | -132.25                                |
